# Supplementary material for: Phospho-regulation of kinesin-5 during anaphase spindle elongation
Source: Oxford University Press journal article supplement (doi:10.1242/jcs.077396), 2011-03-05
Supplement: jcs077396figs1.pdf [file jcs077396figs1.pdf]

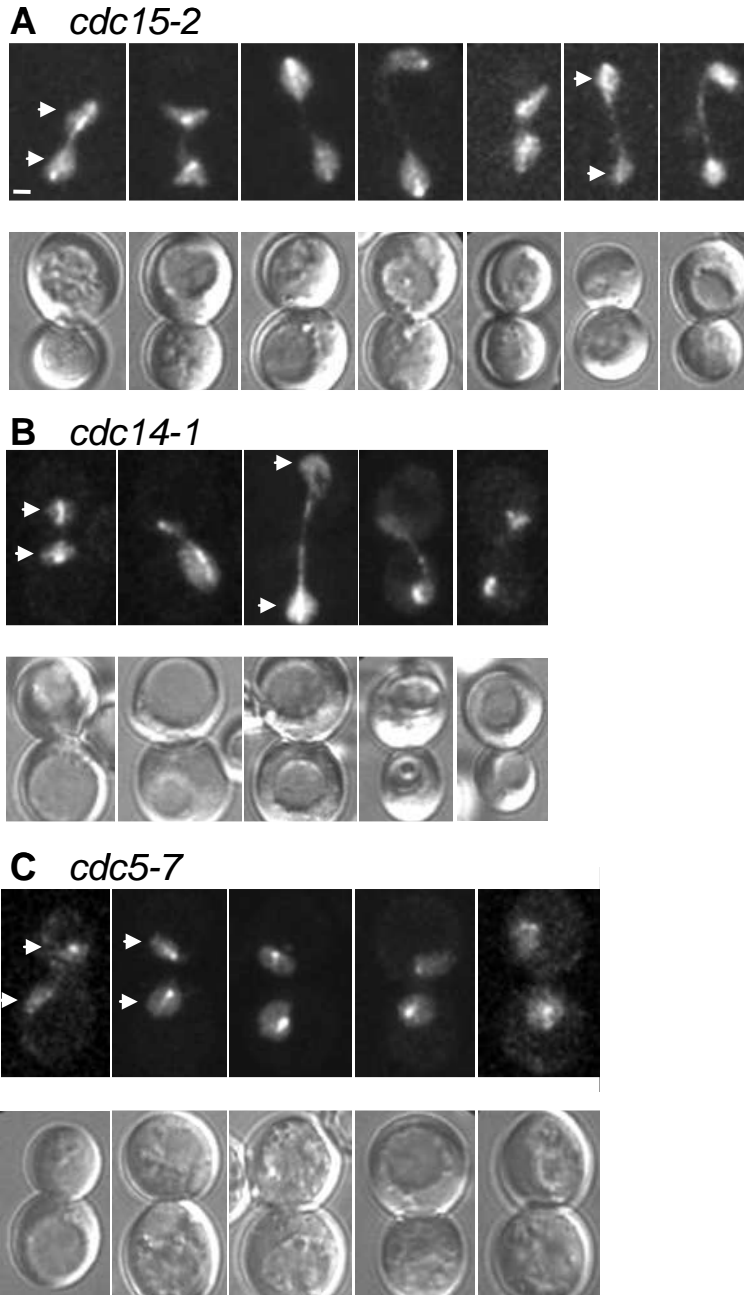

Localization of Cin8-GFP in (A) *cdc15-2*, (B) *cdc14-1* and (C) *cdc5-7* cells arrested in anaphase at 37°C for 2 h. Representative 2D projections are shown. Upper panels – Cin8-GFP, lower panels – corresponding bright field images. Bar, 1  $\mu$ m. In all cells arrested at late anaphase, a large portion of Cin8-GFP is localized diffusively in the divided nuclei (arrows). Strains are: LGY2968, LGY2974 and LGY2986.
