# Supplementary material for: Phospho-regulation of kinesin-5 during anaphase spindle elongation
Source: Oxford University Press journal article supplement (doi:10.1242/jcs.077396), 2011-03-05
Supplement: jcs077396figs2.pdf [file jcs077396figs2.pdf]

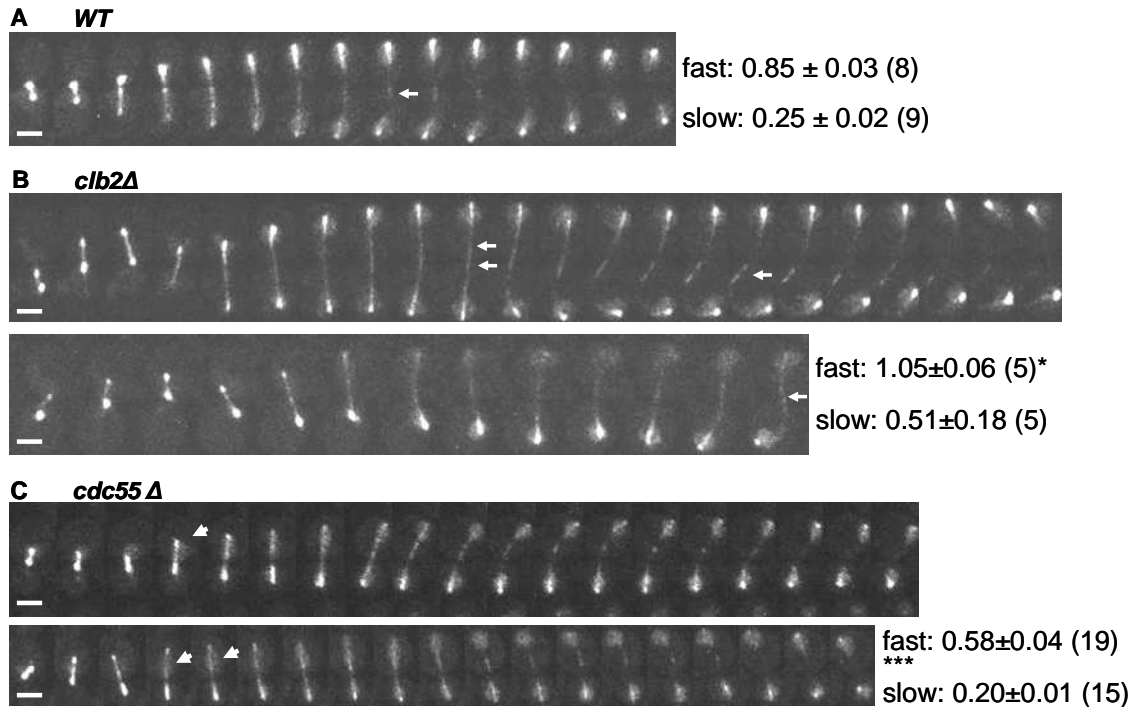

Localization of Cin8-3GFP in (A) WT, (B) *clb2Δ* and (C) *cdc55Δ* cells. 2D projection images of time lapse recording are shown. In B and C, two representative cells in each genotype are shown. Time interval between frames, 2 min. Bar, 2  $\mu$ m. Strains are: LGY 2533, LGY3033 and LGY 3021. In A and B, arrows indicate Cin8 localization to the middle region of the spindle. In C, small arrows indicate diffusive localization of Cin8 in early-mid anaphase, which is not present in WT cells. Spindle elongation rates ( $\mu$ m/min, average  $\pm$  SEM) during the fast and the slow phases for each genotype are indicated. The number of measurements is indicated in parentheses.
