# Supplementary material for: Phospho-regulation of kinesin-5 during anaphase spindle elongation
Source: Oxford University Press journal article supplement (doi:10.1242/jcs.077396), 2011-03-05
Supplement: jcs077396tables1.pdf [file jcs077396tables1.pdf]

## Supplementary Table S1

*S. cerevisiae* strains (S288C) and plasmids used in this study

| Strain #               | Genotype                                                                                               |
|------------------------|--------------------------------------------------------------------------------------------------------|
| <b>LGY 369</b>         | <i>MATa, ura3, leu2, his3, lys2, ade2, cin8Δ::HIS3, cyh2<sup>r</sup>, kip1Δ::HIS3, pTK138</i>          |
| <b>LGY 370</b>         | <i>MATa, ura3, leu2, his3, lys2, ade2, cin8Δ::HIS3, cyh2<sup>r</sup>, kip1Δ::HIS3, pFC23</i>           |
| <b>LGY 1088 (W303)</b> | <i>MATa, his3, leu2, cdc5::KanMX6, TRP1::cdc5-7, pTK138</i>                                            |
| <b>LGY 1092</b>        | <i>MATa, ura3, leu2, his3, ade2, cdc14-1, pTK138</i>                                                   |
| <b>LGY 1320</b>        | <i>MATa, ura3, leu2, his3, lys2, cdc15-2, pTK103</i>                                                   |
| <b>LGY 1610</b>        | <i>MATa, ura3, leu2, his3, lys2, cdc15-2, pRM27</i>                                                    |
| <b>LGY 1715</b>        | <i>MATa, ura3, leu2, his3, lys2, cdc15-2, pRM28</i>                                                    |
| <b>LGY 1717</b>        | <i>MATa, ura3, leu2, his3, lys2, cdc15-2, pRM29</i>                                                    |
| <b>LGY 1765</b>        | <i>MATa, ura3, leu2, his3, ade2, GAL+, pRM18</i>                                                       |
| <b>LGY 1769</b>        | <i>MATa, ura3, leu2, his3, ade2, GAL+, spo12Δ::KanMX6, pRM18</i>                                       |
| <b>LGY 2038</b>        | <i>MATa, ura3, leu2, his3, lys2, ade2, cyh2<sup>r</sup>, cin8Δ::HIS3, kip1Δ::HIS3, pMA1208, pRS316</i> |
| <b>LGY 2055</b>        | <i>MATa, ura3, leu2, his3, lys2, ade2, cin8Δ::URA3, leu2::CIN8-3GFP-LEU2</i>                           |
| <b>LGY 2058</b>        | <i>MATa, ura3, leu2, his3, lys2, ade2, cin8Δ::URA3, leu2::cin8-3A-3GFP-LEU2</i>                        |
| <b>LGY 2237</b>        | <i>MATa, ura3, leu2, lys2, ade2, cin8Δ::URA3, leu2::cin8-3A-3HA-LEU2, his3::TUB1-GFP-HIS3</i>          |
| <b>LGY 2360</b>        | <i>MATa, ura3, leu2, his3, ade2, GAL+, pJKY1</i>                                                       |
| <b>LGY 2366</b>        | <i>MATa, ura3, leu2, his3, lys2, cdc15-2, pJKY1</i>                                                    |
| <b>LGY 2374</b>        | <i>MATa, ura3, leu2, his3, lys2, ade2, cin8Δ::URA3, leu2::CIN8-3HA-LEU2, his3::TUB1-GFP-HIS3</i>       |
| <b>LGY 2424</b>        | <i>MATa, ura3, leu2, his3, ade2, GAL+, cdc55Δ::SpHIS5, pJKY1</i>                                       |
| <b>LGY 2426</b>        | <i>MATa, ura3, leu2, his3, ade2, GAL+, cdc55Δ::SpHIS5, pJKY2</i>                                       |
| <b>LGY 2467</b>        | <i>MATa, ura3, leu2, his3, lys2, cdc15-2, pRM59, pRM40</i>                                             |
| <b>LGY 2533</b>        | <i>MATa, ura3, leu2, his3, ade2, GAL+, pVF37</i>                                                       |
| <b>LGY 2544</b>        | <i>MATa, ura3, leu2, his3, lys2, ade2, cyh2<sup>r</sup>, cin8Δ::HIS3, kip1::HIS3, pJKY1</i>            |
| <b>LGY 2547</b>        | <i>MATa, ura3, leu2, his3, lys2, ade2, cyh2<sup>r</sup>, cin8Δ::HIS3, kip1::HIS3, pJKY2</i>            |
| <b>LGY 2554</b>        | <i>MATa, ura3, leu2, his3, lys2, ade2, cyh2<sup>r</sup>, cin8Δ::HIS3, kip1::HIS3, pJKY12</i>           |
| <b>LGY 2685</b>        | <i>MATa, ura3, leu2, his3, lys2, ade2, cin8Δ::URA3, leu2::cin8-2A-3GFP-LEU2</i>                        |
| <b>LGY 2575</b>        | <i>MATa, ura3, leu2, his3, lys2, cin8Δ::URA3, leu2::cin8-3D-3GFP-LEU2</i>                              |

|                       |                                                                                                                                                                               |
|-----------------------|-------------------------------------------------------------------------------------------------------------------------------------------------------------------------------|
| <b>LGY 2716</b>       | <i>MAT<math>\alpha</math>, ura3, leu2, his3, lys2, ade2, cin8<math>\Delta</math>::URA3, leu2::cin8-3D-3HA-LEU2, his3::TUB1-GFP-HIS3</i>                                       |
| <b>LGY2968</b>        | <i>MAT<math>\alpha</math>, ura3, leu2, his3, lys2, cdc15-2, pVF23</i>                                                                                                         |
| <b>LGY2974</b>        | <i>MAT<math>\alpha</math>, ura3, leu2, his3, ade2, cdc14-1, pVF23</i>                                                                                                         |
| <b>LGY2986 (W303)</b> | <i>MAT<math>\alpha</math>, his3, leu2, cdc5::KanMX6, TRP1::cdc5-7, pVF23</i>                                                                                                  |
| <b>LGY3001</b>        | <i>MAT<math>\alpha</math>, ura3, leu2, his3, ade2, GAL+, cdc55<math>\Delta</math>::SpHIS5, leu2::TUB1-GFP-HIS3</i>                                                            |
| <b>LGY3021</b>        | <i>MAT<math>\alpha</math>, , ura3, leu2, his3, ade2, GAL+, cdc55<math>\Delta</math>::SpHIS5, pVF37</i>                                                                        |
| <b>LGY3033</b>        | <i>MAT<math>\alpha</math>, his3<math>\Delta</math>1, leu2<math>\Delta</math>0, lys2<math>\Delta</math>0, ura3<math>\Delta</math>0, clb2<math>\Delta</math>::KanMX6, pVF37</i> |
| <b>Plasmids</b>       |                                                                                                                                                                               |
| <b>pFC23</b>          | <i>CIN8, LEU, 2<math>\mu</math></i>                                                                                                                                           |
| <b>pJKY1</b>          | <i>CIN8-13myc, URA3, CEN (this study)</i>                                                                                                                                     |
| <b>pJKY2</b>          | <i>cin8-3A-13myc, URA3, CEN (this study)</i>                                                                                                                                  |
| <b>pJKY12</b>         | <i>cin8-3D-13myc, URA3, CEN (this study)</i>                                                                                                                                  |
| <b>pRM18</b>          | <i>6myc-CIN8, URA3, CEN (this study)</i>                                                                                                                                      |
| <b>pRM27</b>          | <i>6myc-cin8-5A, LYS, CEN (this study)</i>                                                                                                                                    |
| <b>pRM28</b>          | <i>6myc-cin8-3A, LYS, CEN (this study)</i>                                                                                                                                    |
| <b>pRM29</b>          | <i>6myc-cin8-2A, LYS, CEN (this study)</i>                                                                                                                                    |
| <b>pRM39</b>          | <i>C-terminus of CIN8-13myc in pTZ18 (this study)</i>                                                                                                                         |
| <b>pRM40</b>          | <i>CIN8-13myc, LYS, CEN (this study)</i>                                                                                                                                      |
| <b>pRM59</b>          | <i>P<sub>GALI</sub>-3HA-CDC14, URA, CEN (this study)</i>                                                                                                                      |
| <b>pTK47</b>          | <i>PstI-XbaI fragment of CIN8 tail containing NotI site before the stop codon in pTZ18, (Kingsbury and Hoyt, unpublished)</i>                                                 |
| <b>pTK103</b>         | <i>6myc-CIN8, LYS2, CEN</i>                                                                                                                                                   |
| <b>pTK138</b>         | <i>6myc-CIN8, LEU, 2<math>\mu</math></i>                                                                                                                                      |
| <b>pMA1208</b>        | <i>CIN8, CYH2, LEU2, CEN</i>                                                                                                                                                  |
| <b>pRS316</b>         | <i>URA3, CEN</i>                                                                                                                                                              |
| <b>pAG26</b>          | <i>CIN8-590-TEV-EGFP-6HIS (pRSET B, bacterial expression, this study)</i>                                                                                                     |
| <b>pJKY34</b>         | <i>cin8-3A-590-TEV-EGFP-6HIS (pRSET B, bacterial expression, this study)</i>                                                                                                  |
| <b>pVF23</b>          | <i>pCIN8-TEV-GFP-6HIS, URA, CEN (this study)</i>                                                                                                                              |
| <b>pVF37</b>          | <i>pCIN8-3GFP, URA, CEN (this study)</i>                                                                                                                                      |
